# Supplementary material for: Downregulation of an Evolutionary Young miR-1290 in an iPSC-Derived Neural Stem Cell Model of Autism Spectrum Disorder
Source: PubMed Central journal article supplement (PMC6525818; doi:10.1155/2019/8710180), 2019-05-02
Supplement: 8710180.f1.pdf [file 8710180.f1.pdf]

- 1 **Table S1.** A list of reviewed set of 67 miR-1290 target genes that were obtained by
- 2 mapping to a curated set of ASD genes.

© 2000-2018 QIAGEN. All rights reserved.

| ID       | Symbol   | Entrez Gene Name                                                                               | Location            | Type(s)                    |
|----------|----------|------------------------------------------------------------------------------------------------|---------------------|----------------------------|
| ABCA4    | ABCA4    | ATP binding cassette subfamily A member 4                                                      | Plasma Membrane     | transporter                |
| ABCD2    | ABCD2    | ATP binding cassette subfamily D member 2                                                      | Cytoplasm           | transporter                |
| ACSL4    | ACSL4    | acyl-CoA synthetase long chain family member 4                                                 | Cytoplasm           | enzyme                     |
| AFF2     | AFF2     | AF4/FMR2 family member 2                                                                       | Nucleus             | other                      |
| ASH1L    | ASH1L    | ASH1 like histone lysine methyltransferase                                                     | Nucleus             | transcription regulator    |
| ATP6AP1  | ATP6AP2  | ATPase H <sup>+</sup> transporting accessory protein 2                                         | Cytoplasm           | transporter                |
| ATP6V1B  | ATP6V1B  | ATPase H <sup>+</sup> transporting V1 subunit B2                                               | Cytoplasm           | transporter                |
| BCORL1   | BCORL1   | BCL6 corepressor like 1                                                                        | Nucleus             | transcription regulator    |
| BPTF     | BPTF     | bromodomain PHD finger transcription factor                                                    | Nucleus             | transcription regulator    |
| BRWD3    | BRWD3    | bromodomain and WD repeat domain containing 3                                                  | Other               | other                      |
| CAMK2A   | CAMK2A   | calcium/calmodulin dependent protein kinase II alpha                                           | Cytoplasm           | kinase                     |
| CAMTA1   | CAMTA1   | calmodulin binding transcription activator 1                                                   | Other               | other                      |
| CASK     | CASK     | calcium/calmodulin dependent serine protein kinase                                             | Plasma Membrane     | kinase                     |
| CCNA2    | CCNA2    | cyclin A2                                                                                      | Nucleus             | other                      |
| CD96     | CD96     | CD96 molecule                                                                                  | Plasma Membrane     | other                      |
| CHRM3    | CHRM3    | cholinergic receptor muscarinic 3                                                              | Plasma Membrane     | G-protein coupled receptor |
| CLTC     | CLTC     | clathrin heavy chain                                                                           | Plasma Membrane     | other                      |
| CNTNAP1  | CNTNAP1  | contactin associated protein like 2                                                            | Plasma Membrane     | other                      |
| CREBBF   | CREBBP   | CREB binding protein                                                                           | Nucleus             | transcription regulator    |
| CUL4B    | CUL4B    | cullin 4B                                                                                      | Nucleus             | other                      |
| DCC      | DCC      | DCC netrin 1 receptor                                                                          | Plasma Membrane     | transmembrane receptor     |
| DCX      | DCX      | doublecortin                                                                                   | Cytoplasm           | other                      |
| DLG3     | DLG3     | discs large MAGUK scaffold protein 3                                                           | Plasma Membrane     | kinase                     |
| EN2      | EN2      | engrailed homeobox 2                                                                           | Nucleus             | transcription regulator    |
| ERLIN2   | ERLIN2   | ER lipid raft associated 2                                                                     | Plasma Membrane     | kinase                     |
| FCGR2A   | FCGR2A   | Fc fragment of IgG receptor IIa                                                                | Plasma Membrane     | transmembrane receptor     |
| FKTN     | FKTN     | fukutin                                                                                        | Extracellular Space | other                      |
| FRMPD4   | FRMPD4   | FERM and PDZ domain containing 4                                                               | Other               | other                      |
| GABRG1   | GABRG1   | gamma-aminobutyric acid type A receptor gamma1 subunit                                         | Plasma Membrane     | ion channel                |
| HTR2A    | HTR2A    | 5-hydroxytryptamine receptor 2A                                                                | Plasma Membrane     | G-protein coupled receptor |
| HTR2C    | HTR2C    | 5-hydroxytryptamine receptor 2C                                                                | Plasma Membrane     | G-protein coupled receptor |
| KDM5A    | KDM5A    | lysine demethylase 5A                                                                          | Nucleus             | transcription regulator    |
| KIF1A    | KIF1A    | kinesin family member 1A                                                                       | Cytoplasm           | other                      |
| KIF5C    | KIF5C    | kinesin family member 5C                                                                       | Cytoplasm           | enzyme                     |
| L2HGDH   | L2HGDH   | L-2-hydroxyglutarate dehydrogenase                                                             | Cytoplasm           | enzyme                     |
| MECP2    | MECP2    | methyl-CpG binding protein 2                                                                   | Nucleus             | transcription regulator    |
| NLGN4X   | NLGN4X   | neurexin 4, X-linked                                                                           | Plasma Membrane     | enzyme                     |
| NRP2     | NRP2     | neuropilin 2                                                                                   | Plasma Membrane     | kinase                     |
| PAX6     | PAX6     | paired box 6                                                                                   | Nucleus             | transcription regulator    |
| PGAP1    | PGAP1    | post-GPI attachment to proteins 1                                                              | Cytoplasm           | enzyme                     |
| PHF6     | PHF6     | PHD finger protein 6                                                                           | Nucleus             | transcription regulator    |
| PTCHD1   | PTCHD1   | patched domain containing 1                                                                    | Plasma Membrane     | other                      |
| RAB18    | RAB18    | RAB18, member RAS oncogene family                                                              | Cytoplasm           | enzyme                     |
| RBMX     | RBMX     | RNA binding motif protein, X-linked                                                            | Nucleus             | other                      |
| RNF125   | RNF125   | ring finger protein 125                                                                        | Cytoplasm           | enzyme                     |
| RSPRY1   | RSPRY1   | ring finger and SPRY domain containing 1                                                       | Other               | other                      |
| SCN3B    | SCN3B    | sodium voltage-gated channel beta subunit 3                                                    | Plasma Membrane     | ion channel                |
| SCN4B    | SCN4B    | sodium voltage-gated channel beta subunit 4                                                    | Plasma Membrane     | ion channel                |
| SCN7A    | SCN7A    | sodium voltage-gated channel alpha subunit 7                                                   | Plasma Membrane     | ion channel                |
| SERPINE1 | SERPINE1 | serpin family E member 1                                                                       | Extracellular Space | other                      |
| SETBP1   | SETBP1   | SET binding protein 1                                                                          | Nucleus             | other                      |
| SLC1A2   | SLC1A2   | solute carrier family 1 member 2                                                               | Plasma Membrane     | transporter                |
| SLC6A1   | SLC6A1   | solute carrier family 6 member 17                                                              | Cytoplasm           | transporter                |
| SMAD4    | SMAD4    | SMAD family member 4                                                                           | Nucleus             | transcription regulator    |
| SMARCB1  | SMARCB1  | SWI/SNF related, matrix associated, actin dependent regulator of chromatin subfamily member B1 | Nucleus             | transcription regulator    |
| SPATA5   | SPATA5   | spermatogenesis associated 5                                                                   | Cytoplasm           | other                      |
| SURF1    | SURF1    | SURF1, cytochrome c oxidase assembly factor                                                    | Cytoplasm           | enzyme                     |
| TAF1     | TAF1     | TATA-box binding protein associated factor 1                                                   | Nucleus             | transcription regulator    |
| TCF4     | TCF4     | transcription factor 4                                                                         | Nucleus             | transcription regulator    |
| TMLHE    | TMLHE    | trimethyllysine hydroxylase, epsilon                                                           | Cytoplasm           | enzyme                     |
| UBE2A    | UBE2A    | ubiquitin conjugating enzyme E2 A                                                              | Cytoplasm           | enzyme                     |
| UBE3B    | UBE3B    | ubiquitin protein ligase E3B                                                                   | Extracellular Space | enzyme                     |
| UHMK1    | UHMK1    | U2AF homology motif kinase 1                                                                   | Nucleus             | kinase                     |
| WARS2    | WARS2    | tryptophanyl tRNA synthetase 2, mitochondrial                                                  | Cytoplasm           | enzyme                     |
| WDR26    | WDR26    | WD repeat domain 26                                                                            | Cytoplasm           | other                      |
| ZBTB24   | ZBTB24   | zinc finger and BTB domain containing 24                                                       | Nucleus             | other                      |
| ZNF711   | ZNF711   | zinc finger protein 711                                                                        | Nucleus             | other                      |

3

4 **Table S2.** The table shows all enriched GO terms shown in the network which are  
 5 statistically significant with a Benjamini-Hochberg corrected p-value of < 0.01.

| GO Groups | GOID       | GO Term                                                              | Ontology Source                                       | Term PValue | Term PValue Corrected with Benjamini-Hochberg | Group PValue | Group PValue Corrected with Benjamini-Hochberg | GO Levels       | % Associated Genes | Nr. Genes | Associated Genes Found <sup>6</sup>     |
|-----------|------------|----------------------------------------------------------------------|-------------------------------------------------------|-------------|-----------------------------------------------|--------------|------------------------------------------------|-----------------|--------------------|-----------|-----------------------------------------|
| Group00   | GO:0043425 | bHLH transcription factor binding                                    | GO_MolecularFunction-EBI-UniProt-GOA_10.07.2018_00h00 | 0.0005      | 0.0010                                        | 0.0005       | 0.0009                                         | [4]             | 6.82               | 3.00      | [ASH1L, CREBBP, TCF4]                   |
| Group01   | GO:0009880 | embryonic pattern specification                                      | GO_BiologicalProcess-EBI-UniProt-GOA_10.07.2018_00h00 | 0.0029      | 0.0034                                        | 0.0029       | 0.0040                                         | [3, 4, 5]       | 3.75               | 3.00      | [NRP2, PGAP1, SMAD4]                    |
| Group02   | GO:0048663 | neuron fate commitment                                               | GO_BiologicalProcess-EBI-UniProt-GOA_10.07.2018_00h00 | 0.0035      | 0.0037                                        | 0.0035       | 0.0043                                         | [4, 5, 7, 8, 9] | 3.53               | 3.00      | [ASH1L, PAX6, SMAD4]                    |
| Group03   | ds:H00480  | Non-syndromic X-linked mental retardation                            | KEGG-HUMAN-DISEASE_10.07.2018                         | 0.0000      | 0.0000                                        | 0.0000       | 0.0000                                         | [-1]            | 19.23              | 5.00      | [ACSL4, AFF2, DLG3, MECP2, NLGN4X]      |
| Group04   | ds:H00658  | Syndromic X-linked mental retardation                                | KEGG-HUMAN-DISEASE_10.07.2018                         | 0.0000      | 0.0000                                        | 0.0000       | 0.0000                                         | [-1]            | 17.24              | 5.00      | [ATP6AP2, BRWD3, CUL4B, FRMPD4, RBMX]   |
| Group05   | ds:H00773  | Autosomal dominant mental retardation                                | KEGG-HUMAN-DISEASE_10.07.2018                         | 0.0000      | 0.0002                                        | 0.0000       | 0.0001                                         | [-1]            | 7.69               | 4.00      | [ASH1L, CAMK2A, KIF1A, SETBP1]          |
| Group06   | ds:H02111  | Autism; Autistic spectrum disorder; Pervasive developmental disorder | KEGG-HUMAN-DISEASE_10.07.2018                         | 0.0000      | 0.0000                                        | 0.0000       | 0.0000                                         | [-1]            | 45.45              | 5.00      | [CNTNAP2, MECP2, NLGN4X, PTCHD1, TMLHE] |
| Group07   | GO:0005248 | voltage-gated sodium channel activity                                | GO_MolecularFunction-EBI-UniProt-GOA_10.07.2018_00h00 | 0.0002      | 0.0005                                        | 0.0036       | 0.0040                                         | [7, 8, 9]       | 9.68               | 3.00      | [SCN3B, SCN4B, SCN7A]                   |
| Group08   | GO:0099528 | G-protein coupled neurotransmitter receptor activity                 | GO_MolecularFunction-EBI-UniProt-GOA_10.07.2018_00h00 | 0.0005      | 0.0010                                        | 0.0135       | 0.0135                                         | [4, 5]          | 6.82               | 3.00      | [CHRM3, HTR2A, HTR2C]                   |
| Group09   | GO:0001046 | core promoter sequence-specific DNA binding                          | GO_MolecularFunction-EBI-UniProt-GOA_10.07.2018_00h00 | 0.0007      | 0.0010                                        | 0.0015       | 0.0023                                         | [7, 8]          | 6.25               | 3.00      | [KDM5A, PAX6, TAF1]                     |
| Group10   | GO:0001764 | neuron migration                                                     | GO_BiologicalProcess-EBI-UniProt-GOA_10.07.2018_00h00 | 0.0001      | 0.0003                                        | 0.0002       | 0.0004                                         | [4, 5, 6, 7, 8] | 3.02               | 6.00      | [ASH1L, CAMK2A, DCC, DCX, NRP2, PAX6]   |
